# Supplementary material
Source: PubMed Central journal article supplement (PMC3350358)
Supplement: supp_blood-2011-10-383406_blood-2011-10-383406-1.pdf [file supp_blood-2011-10-383406_blood-2011-10-383406-1.pdf]

## Supplemental Methods

**Xenogeneic transplantation.** NOD.Cg-PrkdcscidIl2rgtm1Wjl/SzJ (NOD/SCID/IL2r<sup>null</sup>) mice were obtained from The Jackson Laboratory (Bar Harbor, ME). Animals were bred and maintained according to guidelines approved by the Animal Studies Committee of Washington University School of Medicine. All experiments were performed with banked AML cells collected from a patient with French- American-British (FAB) classification system subtype of M5. Human AML cells were engrafted in NOD/SCID/IL2r<sup>null</sup> mice by injecting  $8 \times 10^6$  cells via tail vein injection. At 10-14 weeks post-transplantation, the recipients received G-CSF or plerixafor. Recombinant human G-CSF was administered by daily subcutaneous injection for 5 days at a dose of 250  $\mu$ g/kg. Plerixafor (Genzyme, Cambridge, MA) was supplied as a sterile isotonic aqueous solution at 20 mg/mL and was administered at a dose of 5 mg/kg as a single subcutaneous injection. Mice were bled retro-orbitally before treatment and either 2 hours after plerixafor treatment or 4 to 6 hours after the final G-CSF dose. Complete blood counts were obtained using an automated cell counter (Hemavet; CDC Technologies, Oxford, CT). Human AML engraftment and CXCR4 expression were determined by flow cytometry using anti-human CD45-FITC (clone HI30), anti-human CD184-PE (clone 1D9), anti-human CD33-APC (clone WM53), and anti-murine CD45-APC-Cy7 (clone 30F11) antibodies. The absolute number of murine CD45<sup>+</sup> (muCD45<sup>+</sup>) or human AML (huAML) cells per  $\mu$ L of blood was determined by multiplying the percent 7AAD<sup>-</sup>muCD45<sup>+</sup>huCD45<sup>-</sup> (muCD45<sup>+</sup>) or 7AAD<sup>-</sup>muCD45<sup>-</sup>huCD45<sup>+</sup>huCD33<sup>+</sup> (huAML) cells with the total blood cell count obtained from the automated cell counter.

## Figure Legend

**Supplemental Figure 1. Human AML engraftment and mobilization in NOD/SCID/IL2r<sup>null</sup> mice.** NOD/SCID/IL2r<sup>null</sup> mice were injected retro-orbitally with  $8 \times 10^6$  human AML (huAML) blast cells. At 10-14 weeks post-transplantation, recipients were treated with G-CSF 250  $\mu$ g/kg per day subcutaneously for 5 days (n = 20) or a single injection of plerixafor at 5 mg/kg (n = 20) subcutaneously. Peripheral blood samples collected before or after mobilization were analyzed on an automated cell counter. Human AML engraftment and mobilization was determined by flow cytometry using monoclonal antibodies specific for human CD45, CD33, CD184 and murine CD45. (A) Absolute number of murine CD45<sup>+</sup> (muCD45<sup>+</sup>) and huAML blasts before and after mobilization. The absolute number of muCD45<sup>+</sup> or huAML blast cells per  $\mu$ L of blood was determined by multiplying the percent 7AAD<sup>-</sup>muCD45<sup>+</sup>huCD45<sup>-</sup> (muCD45<sup>+</sup>) or 7AAD<sup>-</sup>muCD45<sup>-</sup>huCD45<sup>+</sup>huCD33<sup>+</sup> (huAML) cells with the total blood cell count. (B) Change in muCD45<sup>+</sup> and huAML blasts in the peripheral blood expressed as fold-change relative to baseline at 2 hours after administration of plerixafor or 4 to 6 hours after the final G-CSF dose. (C) Relative changes in the amount of cell surface-expressed CXCR4. The flow cytometric histograms show overlays of CXCR4 surface expression on huAML blasts before and after mobilization with plerixafor or G-CSF. Relative mean fluorescence intensity ratios (RMFI) were calculated by dividing the mean fluorescence intensity of CD184 by the mean fluorescence intensity of a rat IgG2a isotype control. Change in surface CD184 expression on huAML blasts is expressed as the fold-change in CD184 RMFI relative to baseline at 2 hours after administration of plerixafor or 4 to 6 hours after the final G-CSF dose. The data (mean  $\pm$  SEM) are pooled from two (G-CSF mobilization) or three (plerixafor mobilization) independent experiments. \**P* < 0.05, \*\**P* < 0.01, \*\*\**P* < 0.001.

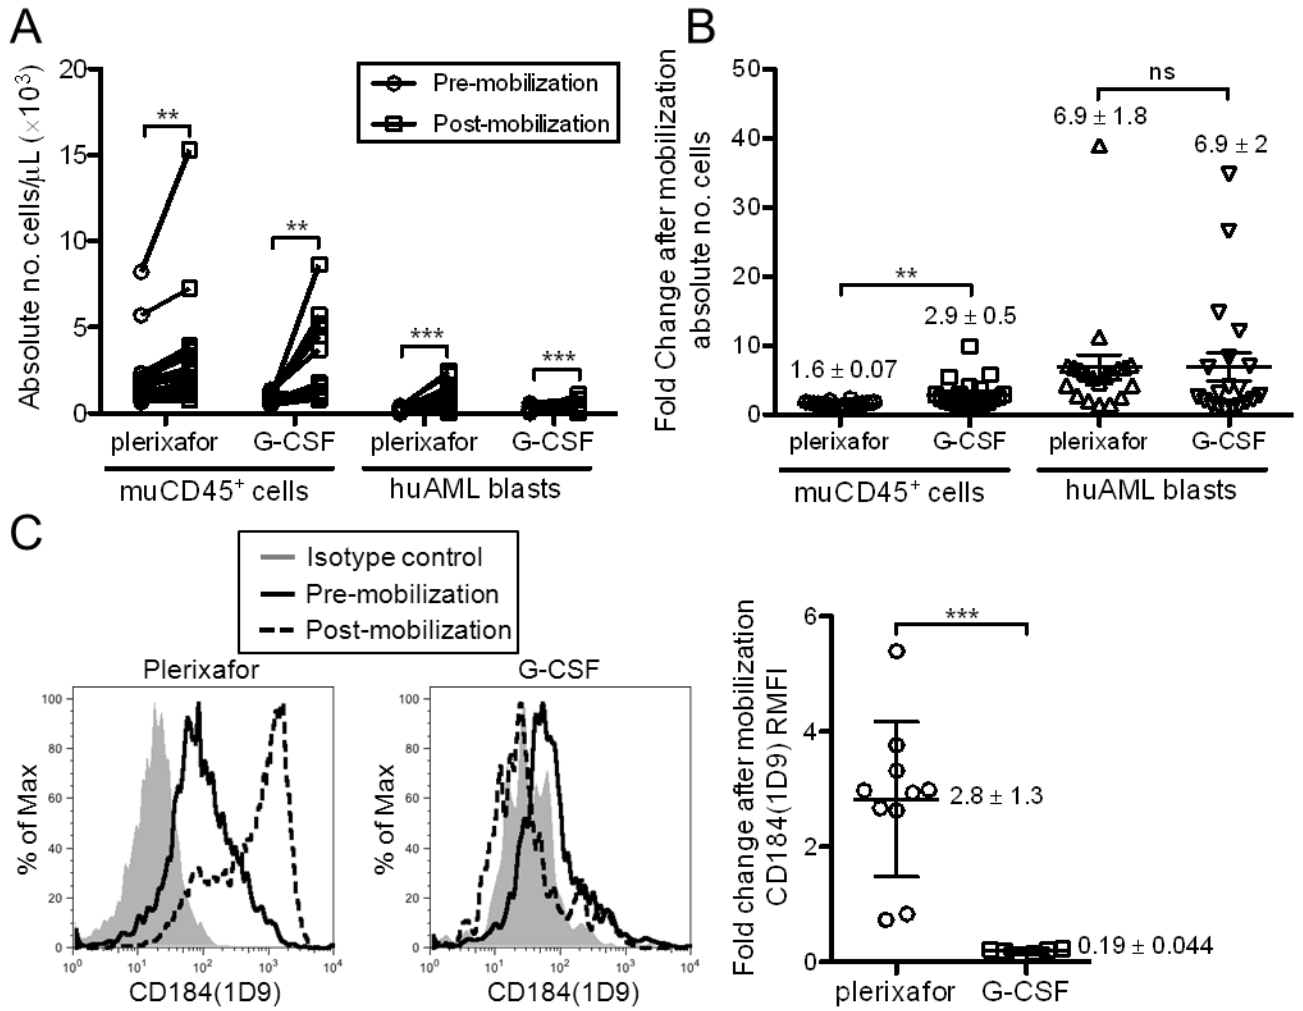

Supplemental Figure 1.

**Supplemental Table 1. Adverse Events by Grade and Frequency**

|                                    | AE GRADE |    |    |   |   |
|------------------------------------|----------|----|----|---|---|
|                                    | 1        | 2  | 3  | 4 | 5 |
| <b>Allergy</b>                     |          |    |    |   |   |
| Allergic Reaction/Hypersensitivity | 2        | 1  |    |   | 1 |
| Allergic Rhinitis                  |          |    |    |   |   |
| <b>Cardiovascular</b>              |          |    |    |   |   |
| Atrial Fibrillation                | 1        |    |    |   |   |
| Atrial Flutter                     |          | 1  | 1  |   |   |
| Bradycardia                        | 9        | 1  |    |   |   |
| Bruising                           | 1        | 1  |    |   |   |
| Cardiac Ischemia/Infarct           |          |    |    |   |   |
| Edema                              | 29       | 10 |    |   |   |
| Hematoma                           | 3        | 1  |    |   |   |
| Hemorrhage                         | 6        | 2  | 1  |   |   |
| Hypertension                       | 5        | 5  |    |   |   |
| Hypotension                        | 6        | 8  | 3  |   |   |
| Palpitations                       | 1        |    |    |   |   |
| Tachycardia                        | 35       | 1  |    |   |   |
| Thrombosis/Embolism                |          | 1  |    |   |   |
| Vasovagal Episode                  |          | 1  |    |   |   |
| <b>Constitutional</b>              |          |    |    |   |   |
| Blurred Vision                     |          |    |    |   |   |
| Decreased Appetite                 | 1        |    |    |   |   |
| Diaphoresis                        | 2        |    |    |   |   |
| Fatigue                            | 11       | 6  | 2  |   |   |
| Fever                              | 1        |    |    |   |   |
| Fever-No Infection                 | 4        | 1  | 50 | 1 |   |
| Infection                          | 3        | 2  | 8  |   | 2 |
| Weakness                           | 16       | 18 | 2  |   |   |
| Weight Gain                        |          |    |    |   |   |
| Weight Loss                        | 1        |    |    |   |   |
| <b>Dermatologic</b>                |          |    |    |   |   |
| Alopecia                           | 1        |    |    |   |   |
| Bumps                              |          | 3  |    |   |   |
| Cellulitis                         | 13       | 7  | 1  |   |   |
| Hand-Foot Reaction                 |          |    |    |   |   |
| Pruritus                           | 8        | 2  |    |   |   |
| Rash                               | 10       | 11 |    |   |   |
| Ulceration                         | 1        |    | 1  |   |   |
| <b>Endocrine</b>                   |          |    |    |   |   |
| Hot Flashes                        | 1        |    |    |   |   |
| Night Sweats                       |          |    |    |   |   |
| <b>Gastrointestinal</b>            |          |    |    |   |   |
| Anorexia                           | 16       | 13 | 4  |   |   |
| Ascites                            |          |    |    |   |   |
| Colitis                            |          |    |    |   |   |
| Constipation                       | 14       | 1  |    |   |   |
| Dehydration                        |          |    |    |   |   |
| Diarrhea                           | 32       | 9  | 2  |   |   |
| Dyspepsia/Heartburn                | 3        | 2  |    |   |   |
| Dysphagia                          | 1        | 2  |    |   |   |
| Flatulence                         |          |    |    |   |   |
| Hemorrhoids                        | 2        | 1  |    |   |   |
| Ileus                              |          |    |    |   |   |
| Indigestion                        | 1        |    |    |   |   |
| Mucositis                          | 21       | 12 | 2  |   |   |

|                                   |    |    |    |    |
|-----------------------------------|----|----|----|----|
| Nausea                            | 36 | 12 | 2  |    |
| Stomatitis                        | 1  | 3  |    |    |
| Vomiting                          | 12 | 11 |    |    |
| <b>Hematological</b>              |    |    |    |    |
| Hemoglobin                        |    | 18 | 12 |    |
| Leukocytes (Wbc)                  | 1  | 2  | 6  | 46 |
| Lymphopenia                       |    |    |    |    |
| Neutrophils (Anc)                 |    |    | 2  | 25 |
| Platelets                         | 2  | 3  | 10 | 28 |
| <b>Hepatic</b>                    |    |    |    |    |
| Alt                               | 7  | 7  | 3  | 1  |
| Ast                               | 9  | 2  | 1  | 1  |
| Bilirubin                         | 7  | 2  | 3  |    |
| Hepatomegaly                      | 1  |    |    |    |
| Jaundice                          | 1  | 1  |    |    |
| <b>Metabolic/Laboratory</b>       |    |    |    |    |
| Alkaline Phosphatase              | 16 | 4  |    |    |
| Chloride                          | 1  |    |    |    |
| Hyperalbumin                      | 1  |    |    |    |
| Hypercalcemia                     | 1  |    |    |    |
| Hypercholesterolemia              |    |    |    |    |
| Hyperkalemia                      | 1  | 1  |    |    |
| Hyponatremia                      | 1  | 1  |    |    |
| Hyperphosphatemia                 | 2  |    |    |    |
| Hypertriglyceridemia              |    |    |    |    |
| Hypoalbumin                       | 20 | 9  |    |    |
| Hypocalcemia                      | 30 | 7  |    |    |
| Hypokalemia                       | 13 | 2  | 5  |    |
| Hyponatremia                      | 15 |    | 1  |    |
| Hypophosphatemia                  | 5  | 1  | 2  |    |
| Magnesium                         | 1  |    |    |    |
| Phosphate                         |    | 1  |    |    |
| <b>Neurological</b>               |    |    |    |    |
| Confusion                         | 4  |    | 3  |    |
| Dizziness                         | 5  |    |    |    |
| Headache                          | 18 | 5  | 2  |    |
| Insomnia                          | 10 | 7  |    |    |
| Mood Alteration                   | 1  | 1  |    |    |
| Mood Alteration - Anxiety         | 9  | 7  |    |    |
| Mood Alteration - Depression      | 2  | 1  |    |    |
| Mood Alteration - Lethargy        | 1  |    | 1  |    |
| Neuropathy (Type _____)           | 5  | 1  |    |    |
| Numbness                          | 3  | 1  |    |    |
| Rigors                            | 5  | 4  |    |    |
| Seizure                           |    |    |    |    |
| Singultus                         | 2  |    |    |    |
| Somnolence                        |    |    | 1  |    |
| Syncope                           |    |    |    |    |
| Taste Alteration                  | 1  | 1  |    |    |
| Tingling                          | 3  | 1  |    |    |
| Tremor                            |    | 1  | 1  |    |
| <b>Pulmonary</b>                  |    |    |    |    |
| Atelectasis                       |    | 1  |    |    |
| Cough                             | 8  | 6  |    |    |
| Dyspnea (Sob)                     | 7  | 7  |    |    |
| Hypoxia                           |    |    | 1  |    |
| Pneumonia                         |    |    | 1  |    |
| Pneumonitis/Pulmonary Infiltrates |    |    |    |    |

|                             |    |    |   |   |
|-----------------------------|----|----|---|---|
| Pneumothorax                |    |    |   |   |
| Tachypnea                   | 3  |    | 1 |   |
| <b>Renal/Genito-Urinary</b> |    |    |   |   |
| Creatinine                  |    |    |   |   |
| Dysuria                     |    |    |   |   |
| Eye Redness                 | 2  |    |   |   |
| Hematuria                   |    |    |   |   |
| Incontinence                | 3  | 2  | 1 |   |
| Renal Failure               |    | 1  | 1 |   |
| Urinary Frequency/Urgency   | 4  | 1  | 1 | 1 |
| Urinary Retention           | 3  |    |   |   |
| Urine Color Change          |    |    |   |   |
| Uti                         | 2  |    |   |   |
| Vision Change               | 3  |    |   |   |
| Vision/Occular              |    |    |   |   |
| Vison Blur                  | 3  | 4  |   |   |
| <b>Pain</b>                 |    |    |   |   |
| Pain                        | 78 | 49 | 2 |   |

**Supplemental Table 2. Expression of surface markers in peripheral blood and bone marrow blasts by response to treatment.**

| Antigen      | n  | RMFI Bone Marrow Blasts |                    |      | n  | RMFI Peripheral Blood Blasts |                    |      |
|--------------|----|-------------------------|--------------------|------|----|------------------------------|--------------------|------|
|              |    | CR/CRi                  | Persistent Disease | P    |    | CR/CRi                       | Persistent Disease | P    |
| CD123        | 28 | 3529                    | 4044               | 0.57 | 36 | 289                          | 2317               | 0.34 |
| CD184 (12G5) | 28 | 3347                    | 4455               | 0.50 | 37 | 326                          | 2307               | 0.29 |
| CD184 (1D9)  | 25 | 3879                    | 4321               | 0.94 | 35 | 332                          | 1771               | 0.38 |
| CD31         | 15 | 2151                    | 6380               | 0.32 | 21 | 129                          | 1714               | 0.30 |
| CD44         | 12 | 2057                    | 5216               | 0.42 | 19 | 121                          | 1719               | 0.17 |
| CD49D        | 27 | 4111                    | 4232               | 0.68 | 36 | 320                          | 2364               | 0.36 |
| CD58         | 12 | 9799                    | 7576               | 0.87 | 16 | 132                          | 1876               | 0.52 |
| CD62L        | 15 | 2067                    | 6462               | 0.32 | 21 | 148                          | 1783               | 0.30 |
| CXCR7        | 14 | 2250                    | 4896               | 0.25 | 22 | 135                          | 2281               | 0.28 |
